# Supplementary material
Source: PubMed Central journal article supplement (PMC3135693)

**a****GFP / Endogenous ErbB4  
(1° antibody delete)**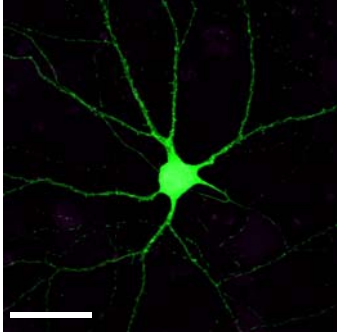**GFP**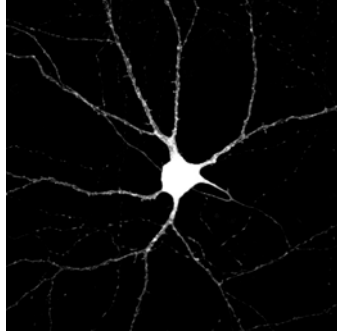**Endogenous ErbB4  
(1° antibody delete)**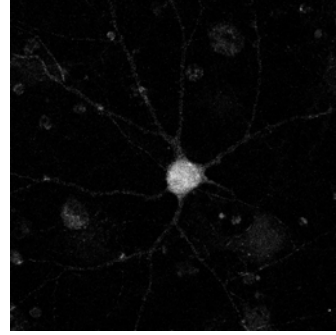**b****GFP+Veh.**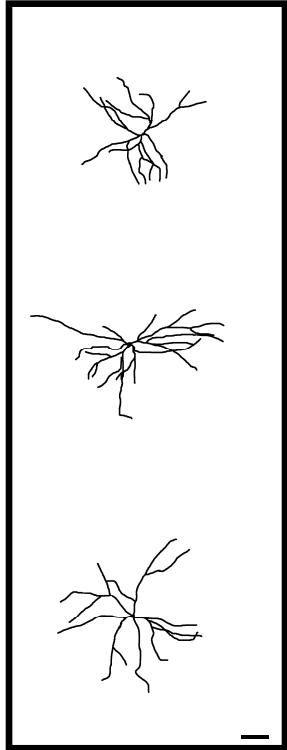**Kalirin RNAi+Veh.**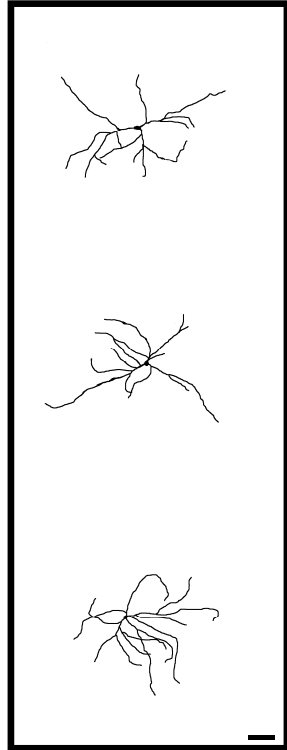**GFP+NRG1**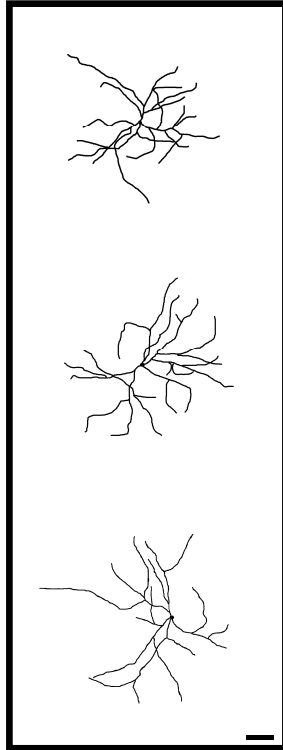**Kalirin RNAi+NRG1**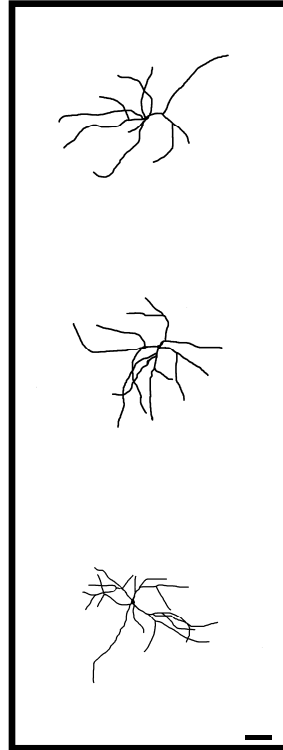

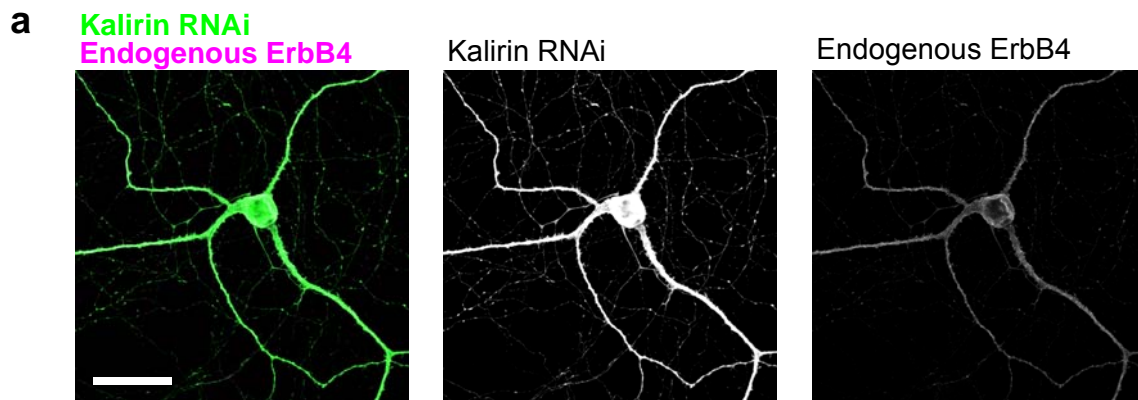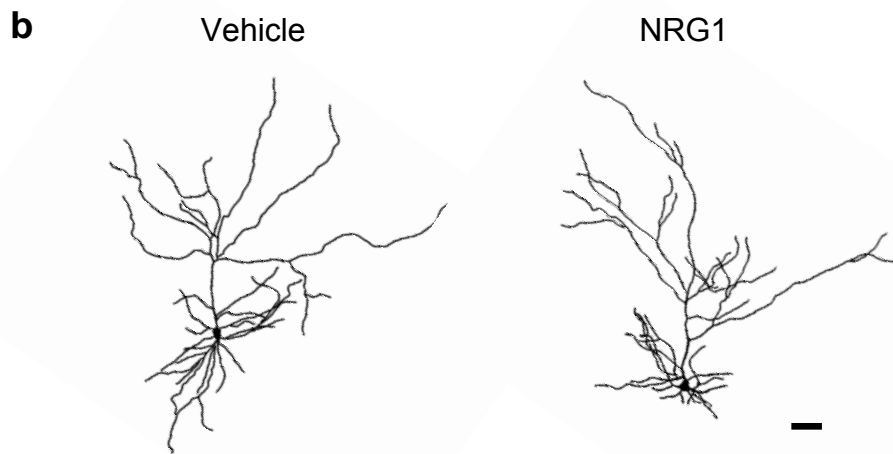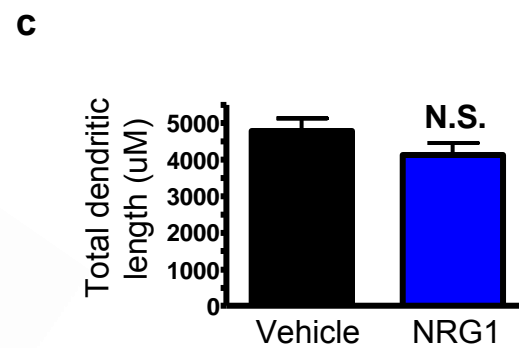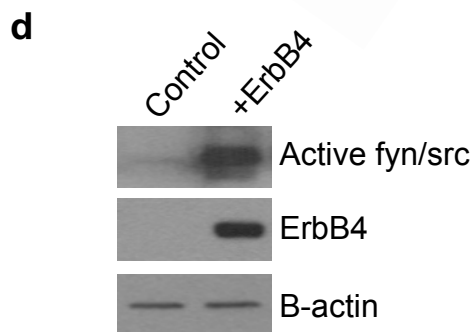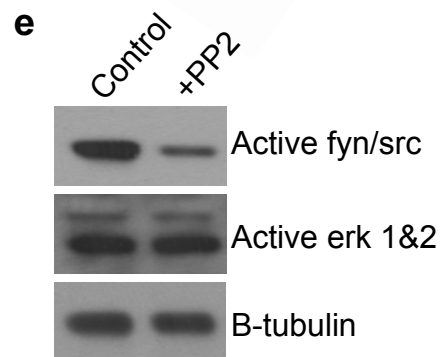

**a****GFP**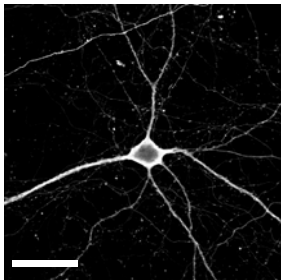**Endogenous Fyn**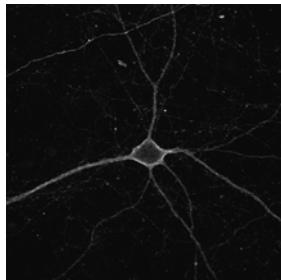**b****GFP**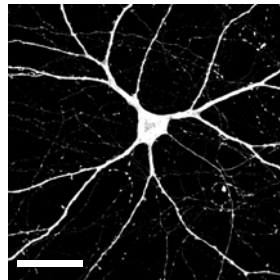**Overexpressed Fyn**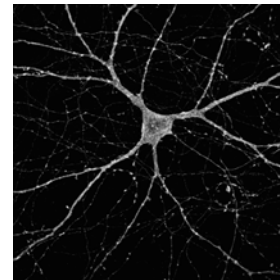**c****GFP**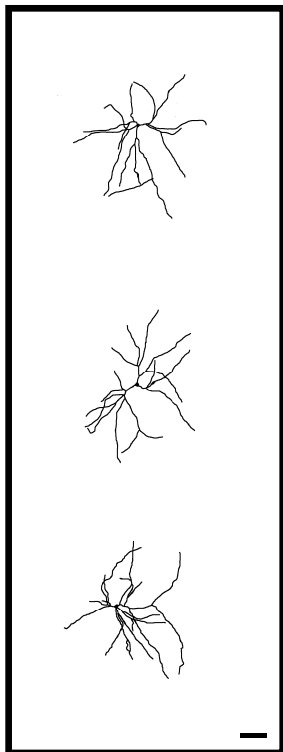**Kalirin RNAi**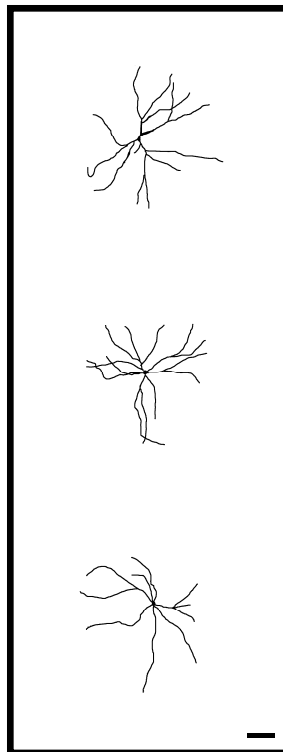**GFP+Fyn**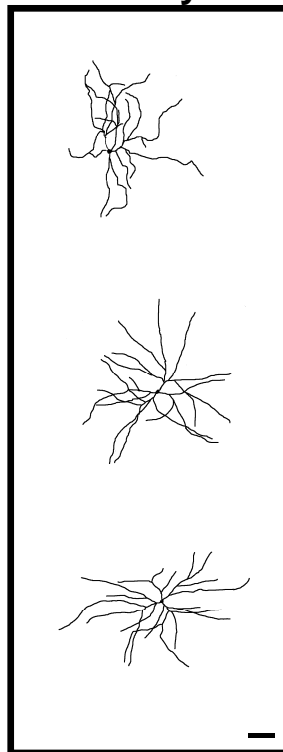**Kalirin RNAi+Fyn**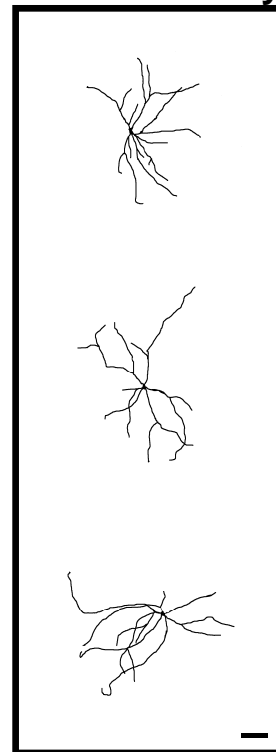

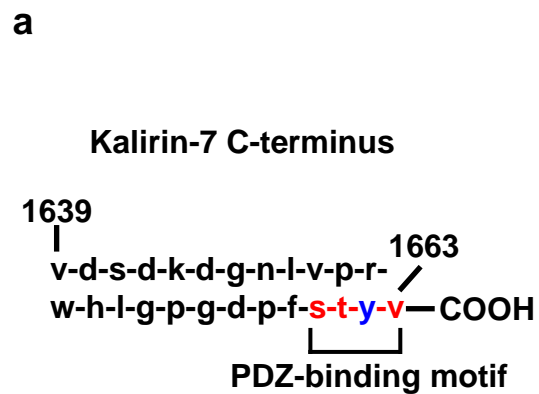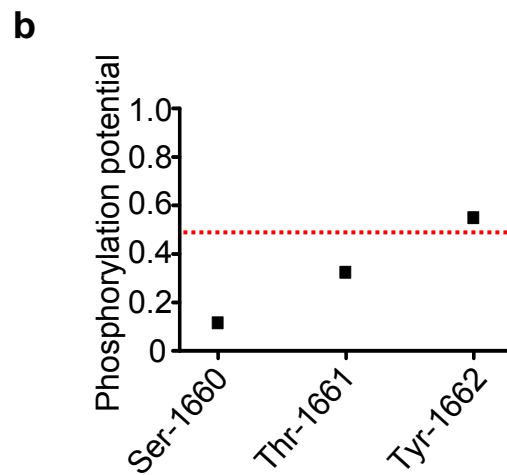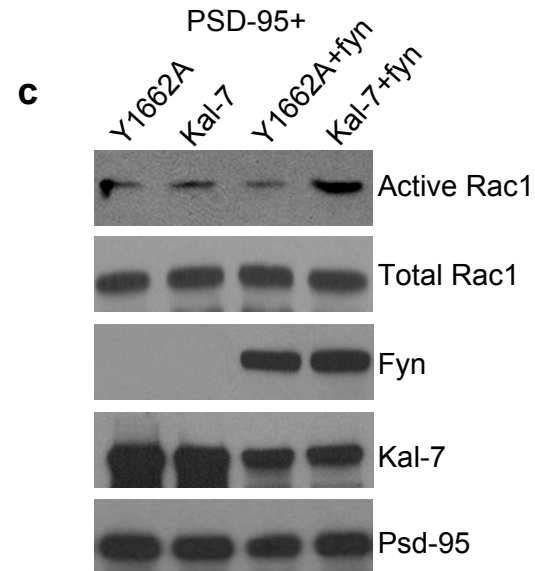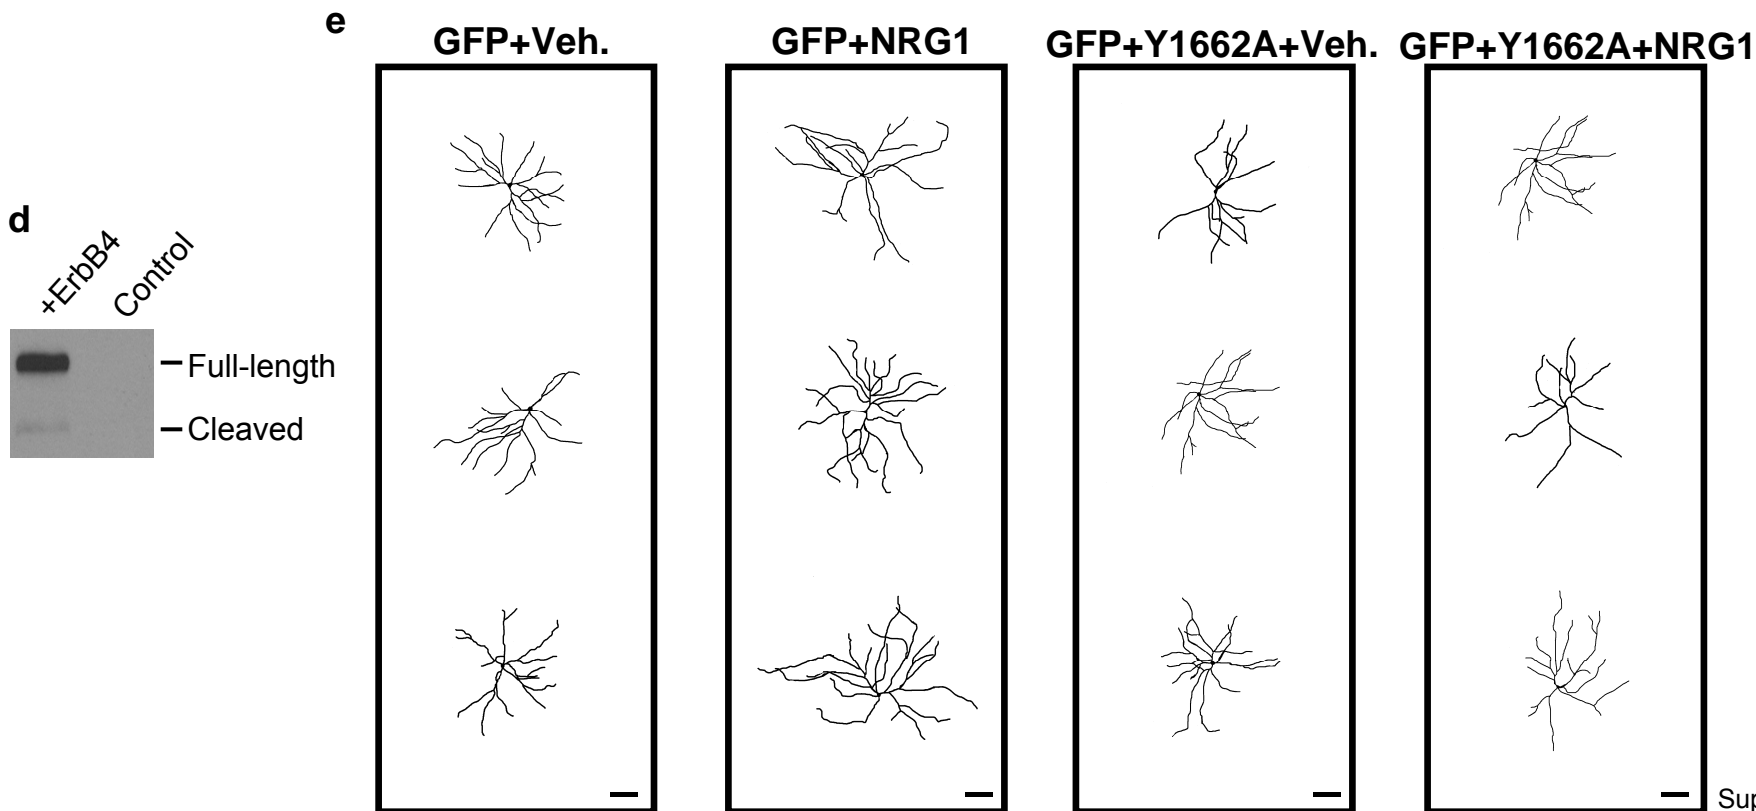

Supplement: NIHMS271136-supplement-2.pdf [file NIHMS271136-supplement-2.pdf]
