# Supplementary material
Source: PubMed Central journal article supplement (PMC3135693)
Supplement: NIHMS271136-supplement-1.pdf [file NIHMS271136-supplement-1.pdf]

## Supplementary Figure Legends

### Supplementary Figure 1

**(a)** Demonstration of erbB4 immunostaining specificity. Immunocytochemistry in the absence of erbB4 primary antibody, but with the applicable secondary antibody, eliminates staining in the dendrites of multipolar interneurons. Scale bar=35uM

**(b)** Additional traces of DIV28 cortical multipolar interneuron dendritic trees. Axons were omitted for clarity. Neurons expressed either GFP or GFP-tagged kalirin RNAi for 3-days. 1-day posttransfection, neurons were treated with either NRG1 $\beta$  (5nM) or with vehicle for 2 days. Scale bar=100um.

### Supplementary Figure 2

**(a)** Interneurons expressing GFP-tagged kalirin RNAi show erbB4 immunoreactivity. Scale bar=35uM.

**(b)** Representative traces of pyramidal neurons transfected with GFP for 3-days and treated one day post-transfection with either vehicle or with NRG1 $\beta$  (5nM; 2-days). Axons were omitted for clarity. Scale bar=50uM.

**(c)** Quantification showing that NRG1 $\beta$  fails to alter the total dendritic length of pyramidal neurons relative to vehicle-treated pyramidal neurons. Data are the mean $\pm$ SEM.

**(d)** ErbB4 overexpression in hEK293 cells increases active fyn/src levels.

**(e)** Treatment with the fyn/src activity inhibitor PP2 (10uM; 3-days) reduces active fyn/src levels in neurons. Active erk 1 and 2 are shown as a control.

### Supplementary Figure 3

**(a)** Endogenous fyn is present in the dendrites of multipolar interneurons. Scale bar=35uM.

**(b)** Overexpressed fyn is targeted to the dendrites of multipolar interneurons. Scale bar=35uM.

**(c)** Additional traces of DIV28 cultured cortical multipolar interneuron dendritic trees. Axons were omitted for clarity. Neurons were transfected with either GFP, GFP-tagged

kalirin RNAi, fyn, or GFP-tagged kalirin RNAi in combination with fyn. Scale bar=100um.

#### **Supplementary Figure 4**

**(a)** Depiction of the amino acid sequence of the C-terminus of kalirin-7. The C-terminus contains a single tyrosine residue located at the 1662 site (shown in blue), and this residue lies within the PDZ-binding motif of kalirin-7 necessary for its interaction with PSD-95.

**(b)** Of the phosphorylatable residues in the kalirin-7 PDZ-binding motif, only the Y1662 residue exceeds chance levels of being a kinase substrate. Phosphorylation potential of individual residues was determined by using the Net Phos 2.0 program (Technical University of Denmark). Program details were published in.<sup>1</sup>

**(c)** hEK293 cells overexpressing PSD-95 in combination with WT kalirin-7 or Y1662A mutant kalirin-7 in the absence or presence of fyn. Fyn stimulated WT kalirin-7 but not the Y1662A mutants' ability to increase active Rac1 levels.

**(d)** hEK293 cells with or without erbB4 overexpression. Both full-length and cleaved erbB4 were detected in cells overexpressing erbB4, while both bands were absent in cells lacking erbB4. The vast majority of erbB4 signal is the full-length receptor.

**(e)** Additional traces of DIV28 cultured cortical multipolar interneuron dendritic trees. Axons were omitted for clarity. Neurons expressed either GFP alone or in combination with Y1662A kalirin-7 for 3-days. 1-day posttransfection, neurons were treated with either NRG1 $\beta$  (5nM) or with vehicle for 2 days. Scale bar=100um.

## Supplementary materials and methods

### Antibodies and Reagents

The following antibodies were used: monoclonal PSD-95 (Neuromab), monoclonal GFP (Chemicon), polyclonal GFP (Richard Huganir, Johns Hopkins University), monoclonal Fyn (BD Transduction Laboratories), monoclonal Rac1 (Millipore), polyclonal anti-phospho fyn/src416 (Cell Signaling Technology), monoclonal phospho-tyrosine (Southern Biotech.). Monoclonal erbB4 antibody against the c-terminus of erbB4 (C-7 clone from Santa Cruz Biotechnology) was used for assessing the co-immunoprecipitation interaction of kalirin-7 with erbB4 in neurons. For assessment of the co-localization between erbB4 and kalirin-7 in interneurons, the HFR antibody clone against erbB4 was used (Santa Cruz Biotechnology). Antibodies against kalirin and kalirin-7 were described previously.<sup>2-3</sup> Recombinant neuregulin-1 beta 1 (NRG1 $\beta$ ) was purchased from R&D systems and was reconstituted in sterile PBS with 0.4% bovine serum albumin (BSA); sterile PBS containing 0.4% BSA was used for vehicle treatments. PP2 was purchased from Fisher Scientific.

### cDNA plasmids

The plasmids encoding myc-kalirin-7, myc-kalirin-5 and myc-delta c-terminus kalirin-7 were described previously.<sup>4</sup> The Y1662A kalirin-7 mutant was generated by site-directed mutagenesis using the QuickChange II XL mutagenesis kit (Stratagene). The erbB4 plasmid was a gift from Dr. Gabriel Corfas (Harvard University). The fyn, src, and abl constructs were a gift from Dr. Richard Huganir (Johns Hopkins University).

### Rac1 activation assay

Active Rac1 levels were assessed using a Rac1 Assay kit from Millipore following the manufacturers' protocol with normalization to total Rac1 as described previously.<sup>5-6</sup>

### Neuronal cultures

Medium and high density cortical neuron cultures were prepared from Sprague-Dawley rat E18 embryos as described previously.<sup>7</sup> Neurons were plated onto coverslips or 60 mm dishes, coated with poly-D-lysine (0.2 mg/ml, Sigma), in plating media (feeding media plus 5% fetal calf serum). After 1 hr, the media was changed to feeding media (Neurobasal media supplemented with B27 (Invitrogen) and 0.5 mM glutamine). 200  $\mu$ M D,Lamino-phosphonovalerate (D,L-APV, Ascent Scientific) was added to the media 4 days later. Dissociated postnatal DIV27-30 cortical cultures were assessed.

### Plasmid Transfections

Cortical neurons were transfected with the appropriate cDNAs for 4 hours in Neurobasal media in the presence of Lipofectamine 2000 according to the manufacturer's protocol. Following transfection, neurons were supplanted in Neurobasal media. Neurons were fixed for 10-minutes in 3.7% formaldehyde followed by 10-minutes of methanol pre-chilled to -20°C. Cells were then washed in phosphate buffer saline (PBS), blocked for 1-hour with PBS containing 2% normal goat serum (NGS) and 0.1% Triton. Primary and secondary antibodies were added to cells in PBS containing 2% NGS.

hEK293 cells were transfected overnight with appropriate cDNAs in DMEM media without antibiotic using Lipofectamine 2000. The next morning, DMEM containing 10% fetal bovine serum (FBS) and pen/strep antibiotic was fed to cells. hEK293 cells were transfected when they reached ~40% confluency and were ~95% confluent at the time of harvesting.

## Supplementary References

1. Blom N, Gammeltoft S, Brunak S. Sequence and structure-based prediction of eukaryotic protein phosphorylation sites. *Journal of molecular biology* 1999; **294**: 1351-1362.
2. Ma XM, Johnson RC, Mains RE, Eipper BA. Expression of kalirin, a neuronal GDP/GTP exchange factor of the trio family, in the central nervous system of the adult rat. *J Comp Neurol* 2001; **429**: 388-402.
3. Penzes P, Johnson RC, Alam MR, Kambampati V, Mains RE, Eipper BA. An isoform of kalirin, a brain-specific GDP/GTP exchange factor, is enriched in the postsynaptic density fraction. *The Journal of biological chemistry* 2000; **275**: 6395-6403.
4. Penzes P, Johnson RC, Sattler R, Zhang X, Huganir RL, Kambampati V *et al.* The neuronal Rho-GEF Kalirin-7 interacts with PDZ domain-containing proteins and regulates dendritic morphogenesis. *Neuron* 2001; **29**: 229-242.
5. Xie Z, Srivastava DP, Photowala H, Kai L, Cahill ME, Woolfrey KM *et al.* Kalirin-7 controls activity-dependent structural and functional plasticity of dendritic spines. *Neuron* 2007; **56**: 640-656.
6. Cahill ME, Xie Z, Day M, Photowala H, Barbolina MV, Miller CA *et al.* Kalirin regulates cortical spine morphogenesis and disease-related behavioral phenotypes. *Proceedings of the National Academy of Sciences of the United States of America* 2009; **106**: 13058-13063.
7. Xie Z, Huganir RL, Penzes P. Activity-dependent dendritic spine structural plasticity is regulated by small GTPase Rap1 and its target AF-6. *Neuron* 2005; **48**: 605-618.
